# Supplementary material for: Murine colon proteome and characterization of the protein pathways
Source: PubMed Central journal article supplement (PMC3497880; doi:10.1186/1756-0381-5-11), 2012-08-28

**NSAF {bars representing sample replicate runs}**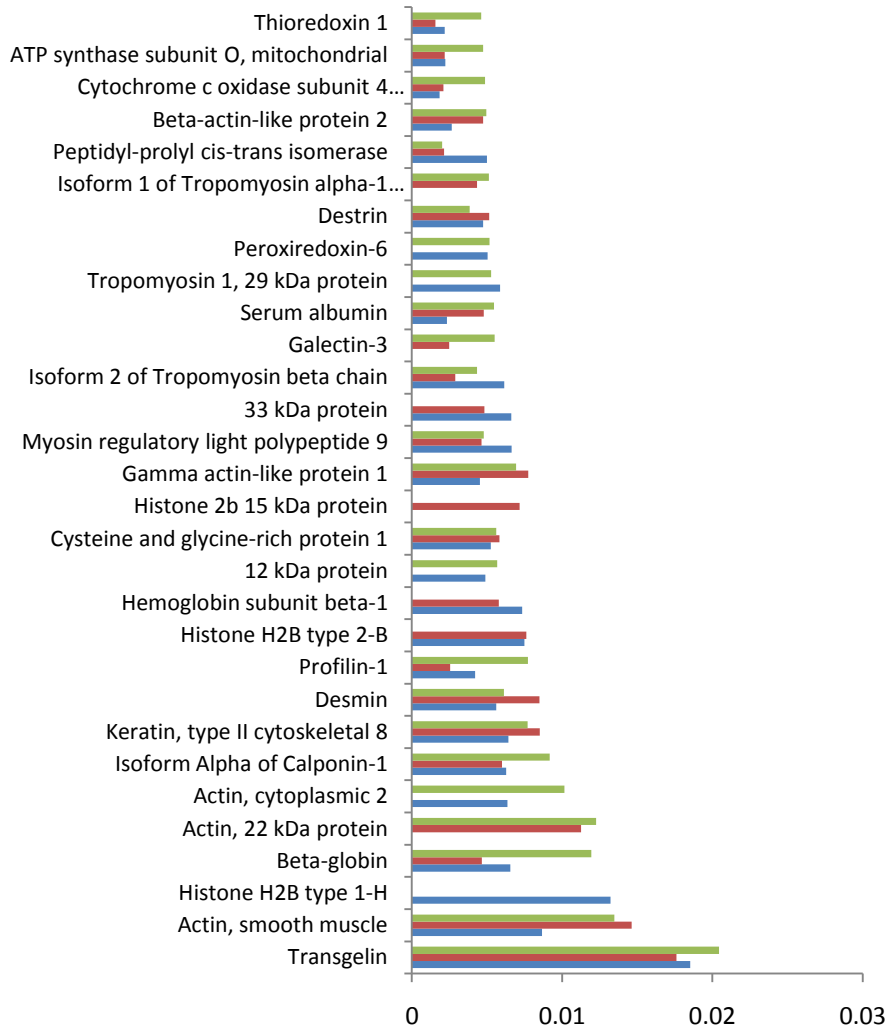

**PAF**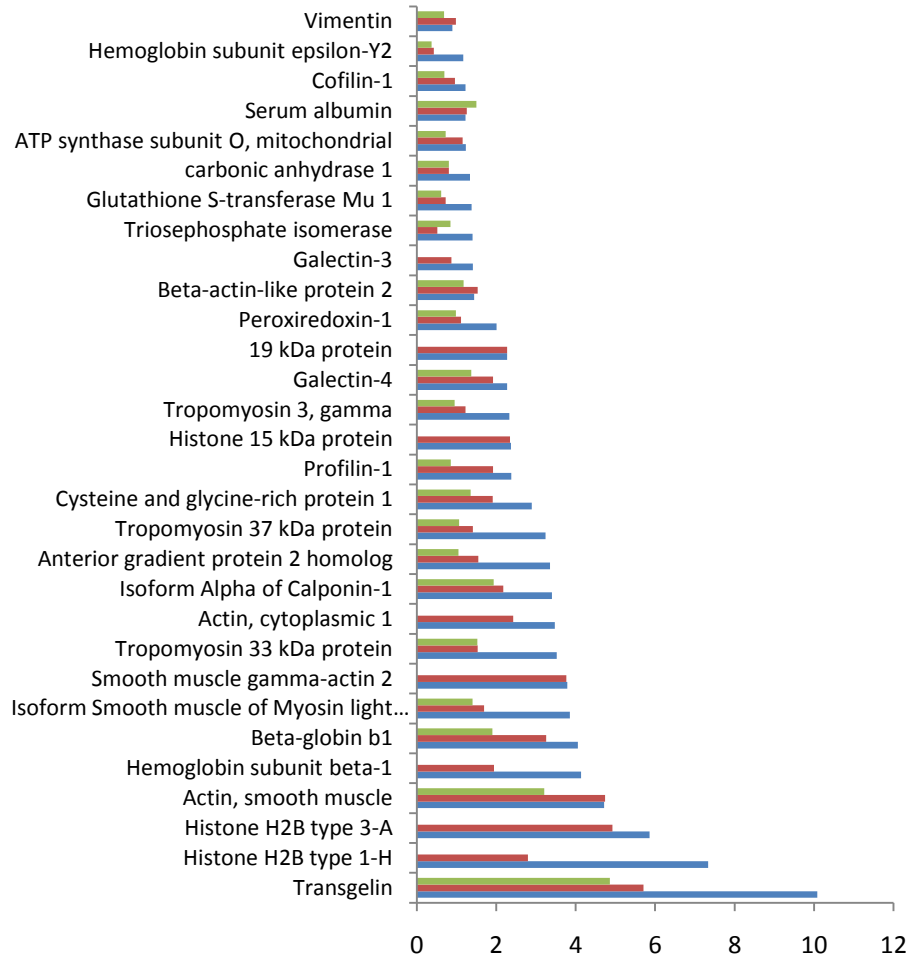

**emPAI**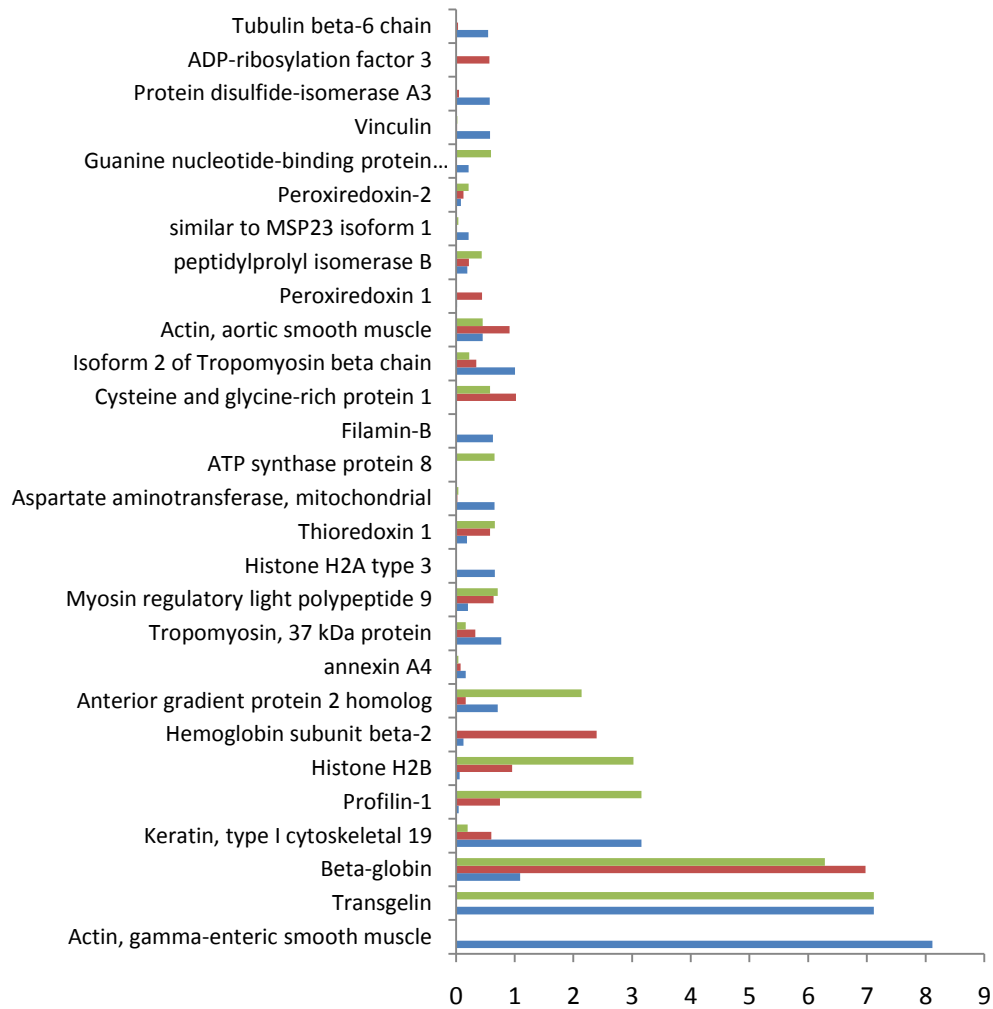

Supplement: 1756-0381-5-11-S4.pdf [file 1756-0381-5-11-S4.pdf]
